# Supplementary material for: A repositioning screen using an FGFR2 splicing reporter reveals compounds that regulate epithelial-mesenchymal transitions and inhibit growth of prostate cancer xenografts
Source: PubMed Central journal article supplement (PMC8971352; doi:10.1016/j.omtm.2022.03.005), 2022-03-17
Supplement: mmc1.pdf [file mmc1.pdf]

OMTM, Volume 25

## **Supplemental information**

**A repositioning screen using an FGFR2 splicing reporter reveals compounds that regulate epithelial-mesenchymal transitions and inhibit growth of prostate cancer xenografts**

**Ling Li, Jinxia Zheng, Megan Stevens, and Sebastian Oltean**

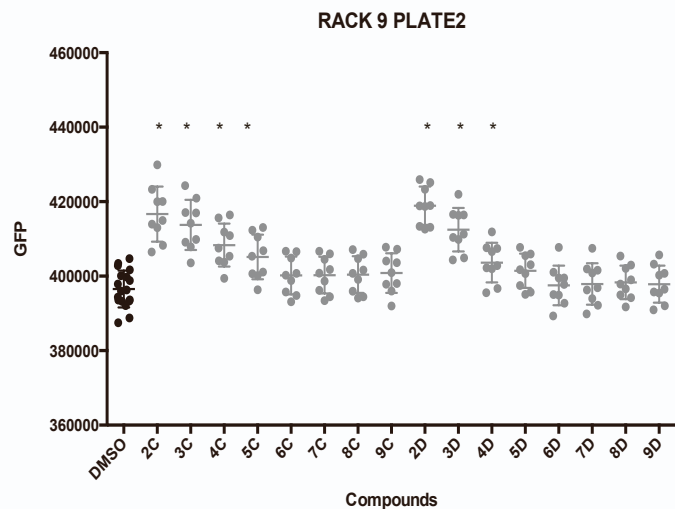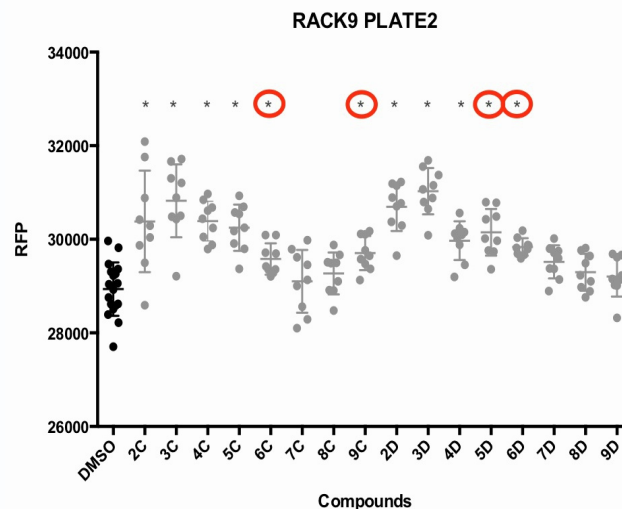

|           |        |         |     |     |
|-----------|--------|---------|-----|-----|
| RFP1 only | Rack 9 | plate 1 |     |     |
|           |        | plate 2 | C06 | C09 |
|           |        |         | D05 | D06 |
|           |        | plate 3 | E07 |     |
|           |        |         | F04 |     |
|           |        | plate 4 |     |     |
|           |        | plate 5 |     |     |
|           |        |         | 11B |     |

**Supplementary Figure 1. Examples of readings in the primary screen, that resulted in narrowing down to 278 compounds.**

**Left panel** represent GFP read-outs from the plate reader and data analysed by Prism.

**Middle panel** represent dsRED read-outs from the plate reader and data analysed by Prism, red circles marked the hits that increased dsRED without increasing GFP signal.

**Right panel** represent the final result, in which red means RFP increase only. X-axis represent the location in the 96-well plate. Each well represent one repeat of one chemical treatment. Each treatment had three repeats. \*p<0.05 by One-way ANOVA using GraphPad Prism.

|         | Primary screen result | Elimination screen | Final result    |
|---------|-----------------------|--------------------|-----------------|
| Rack 10 | D07                   | RFP↑ only          | False-positives |
| Rack 10 | F04                   | RFP↑ + GFP↓        | False-positives |
| Rack 13 | B04                   | RFP↑ only          | GFP↓ only       |
| Rack 14 | B05                   | RFP↑ only          | False-positives |
| Rack 15 | E10                   | GFP↓ only          | RFP↑ only       |

**Supplementary Figure 2. Examples of eliminating false-positive**

Red means RFP increase only, green means GFP decrease only, and yellow means both of them in the primary screen. Rack10, compound D07 showed RFP increase in primary screen but also showed the same result in elimination-screen, so it was eliminated. Rack13 B04 showed both changes in the primary screen while only increased RFP in the elimination screen; therefore, the effect suggested by GFP decrease may be a real one, related to splicing and not a false-positive.

A.

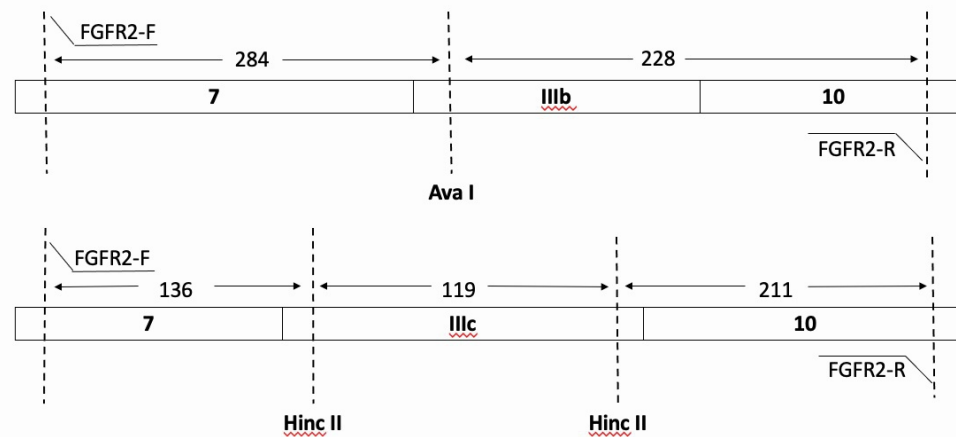

B.

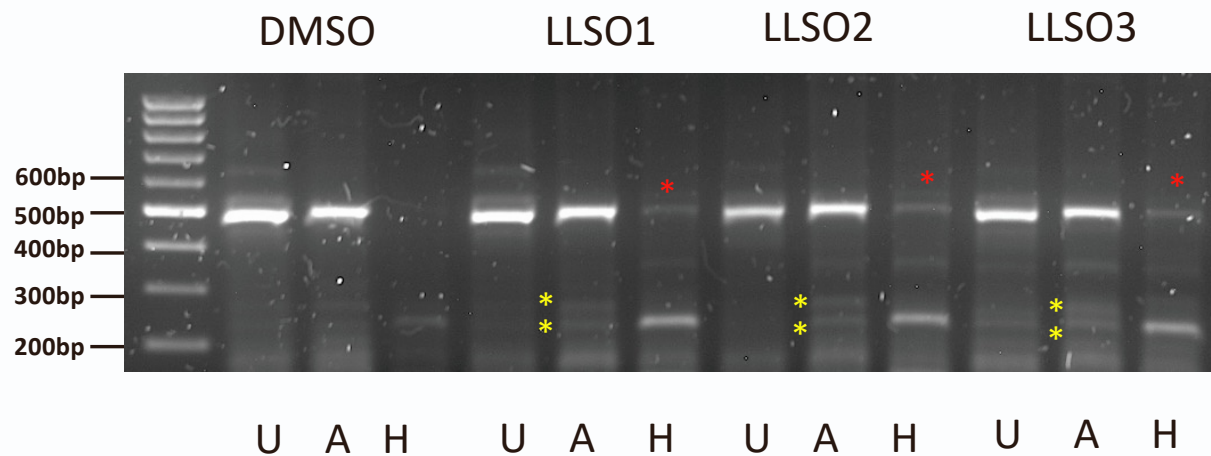

Supplementary Figure 3. The same analysis as Figure 2 (see legend) but done in PC3 prostate cancer cells instead of HEK293

PC3 cells

LnCaP DMSO LLSO01 LLSO02 LLSO03

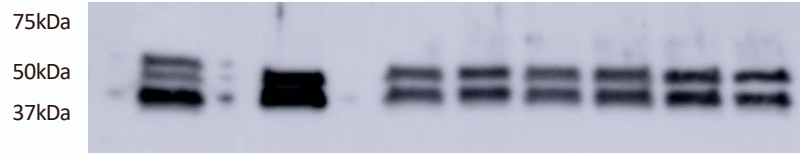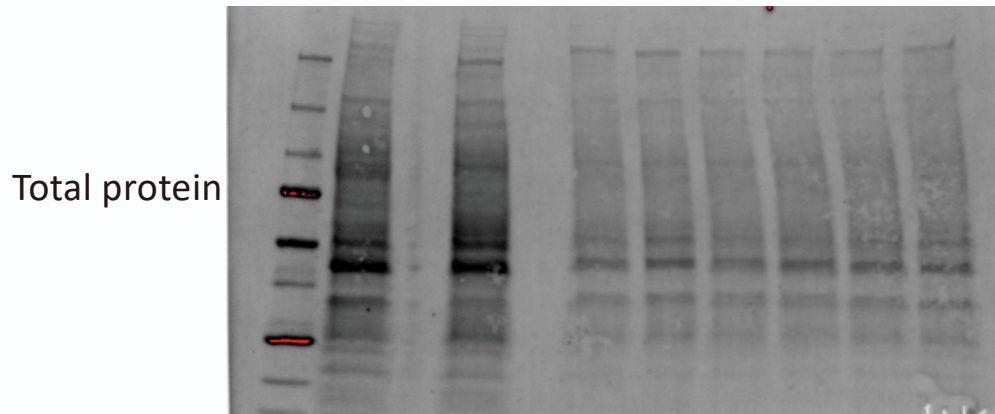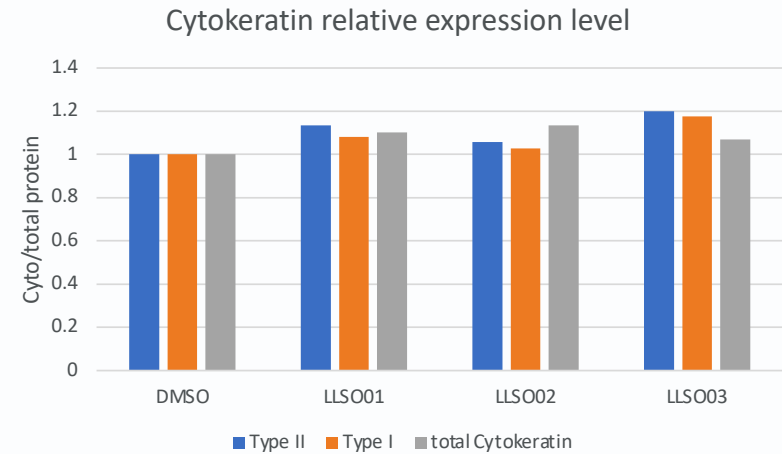

**Supplementary Figure 4. Response of additional markers of EMT to LLSOs treatment - cytokeratins.** Western blot analysis showing a slight increase in cytokeratins expression in PC3 cells exposed to LLSOs treatments for 48 h at 10uM (n=2 replicates, 1experiment).

20x

PC3+DMSO

1° Ab:Ncadherin

2° Ab: goat anti  
mouse 488

PC3+LLSO1

1° Ab:Ncadherin

2° Ab: goat anti  
mouse 488

PC3+LLSO2

1° Ab:Ncadherin

2° Ab: goat anti  
mouse 488

PC3+LLSO3

1° Ab:Ncadherin

2° Ab: goat anti  
mouse 488

DAPI

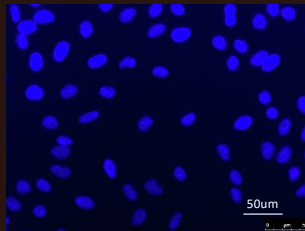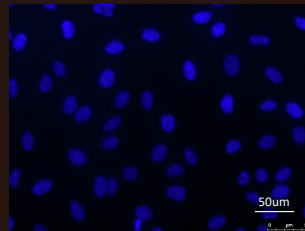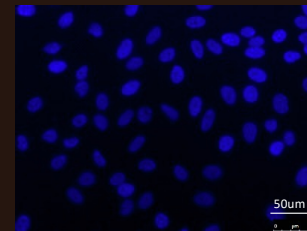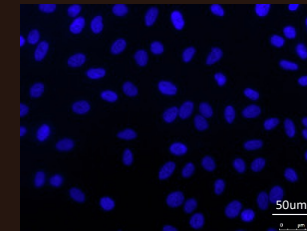

N-  
Cadherin

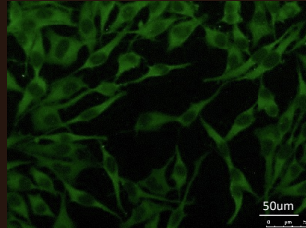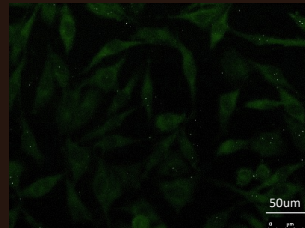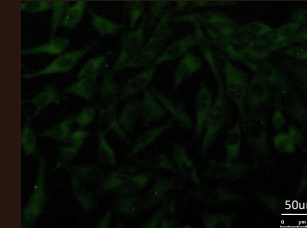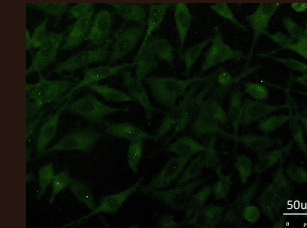

**Supplementary Figure 5.** Immunofluorescence analysis of PC3 cells treated with LLSO1, LLSO2 or LLSO3 at 10 µM for 48 hours shows a decrease in expression of N-cadherin. Representative examples from at least 10 microscopic fields per experiment, and experiments repeated 3 times. Pictures taken at 200 X magnification.

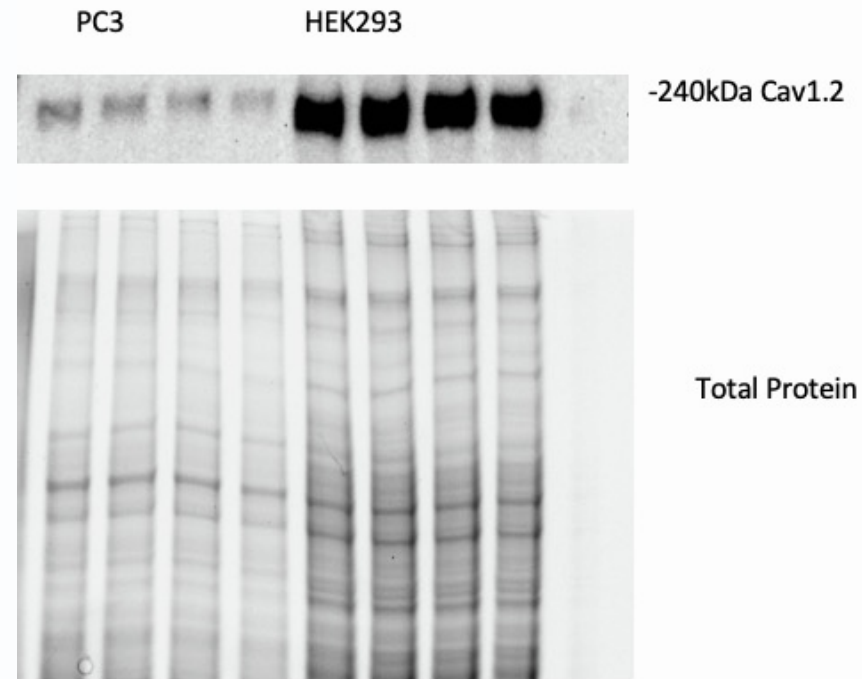

**Supplementary Figure 6. L-type Ca channels are expressed in PC3 prostate cancer cells**

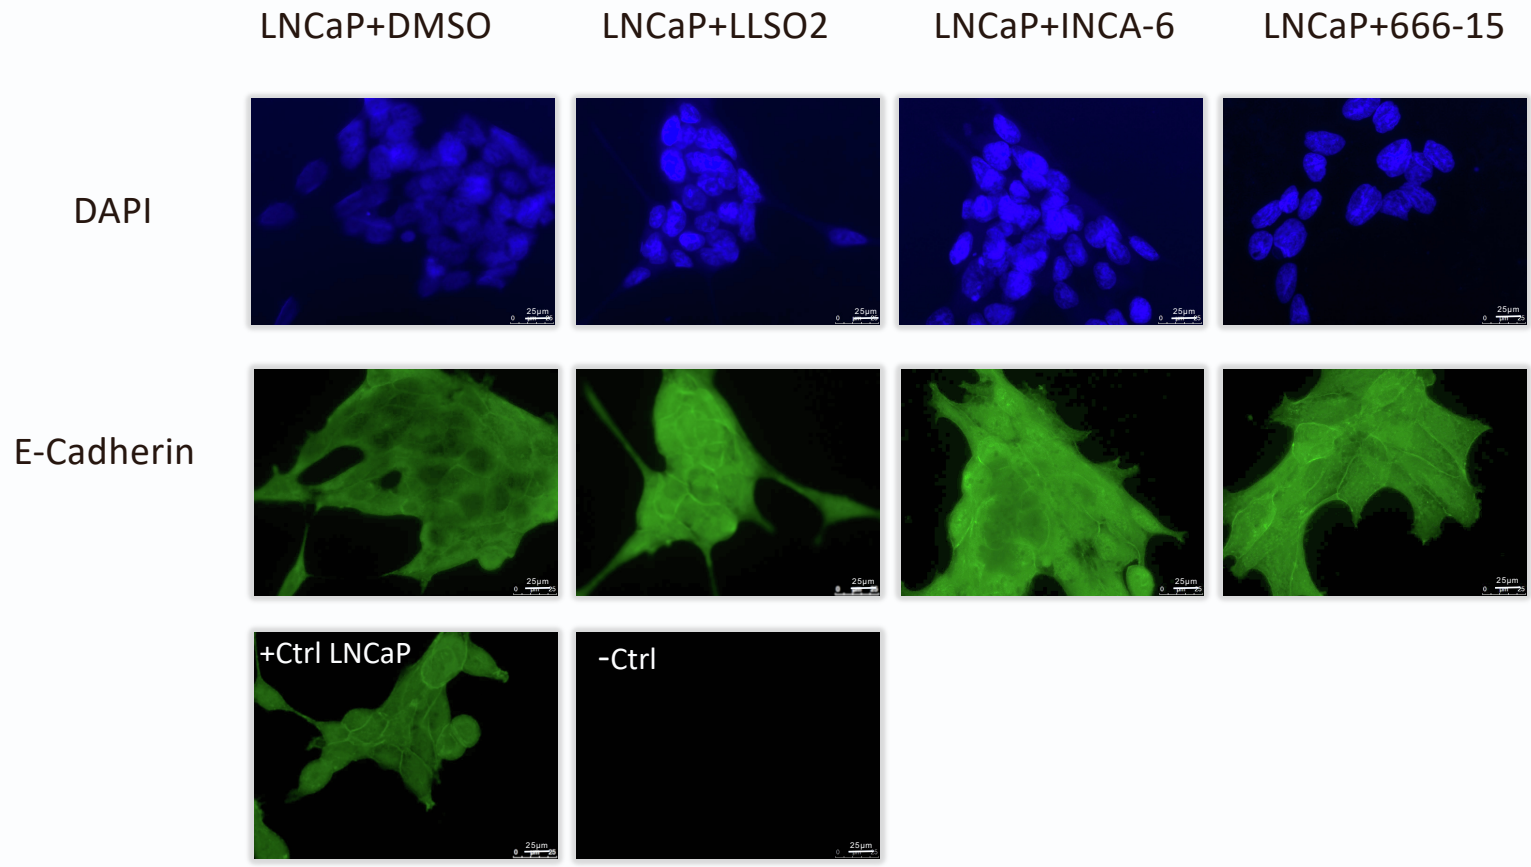

**Supplementary Figure 7. LLSO02 uses NFAT and/or CREB to signal to increase E-cadherin expression in LNCaP cells**  
 Images of LNCaP cells treated separately with 10 $\mu$ M of LLSO2, 10 $\mu$ M of INCA-6, and 10 $\mu$ M of 666-15  
 All images are taken at 20x magnification.



20x

PC3+DMSO

1° Ab:Ncadherin  
2° Ab: goat anti  
mouse 488

PC3+LLSO1

1° Ab:Ncadherin  
2° Ab: goat anti  
mouse 488

PC3+LLSO2

1° Ab:Ncadherin  
2° Ab: goat anti  
mouse 488

PC3+LLSO3

1° Ab:Ncadherin  
2° Ab: goat anti  
mouse 488

PC3+INCA-6

1° Ab:Ncadherin  
2° Ab: goat anti  
mouse 488

PC3+LLSO2+INCA-6

1° Ab:Ncadherin  
2° Ab: goat anti  
mouse 488

DAPI

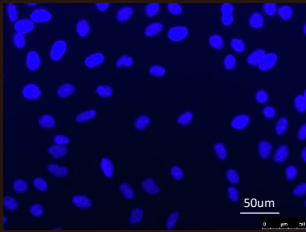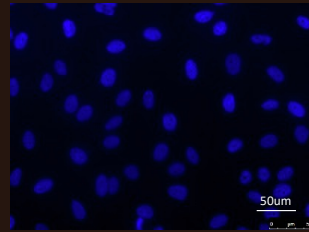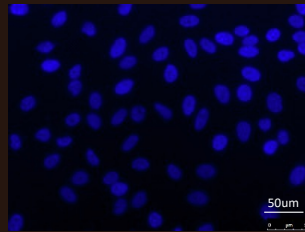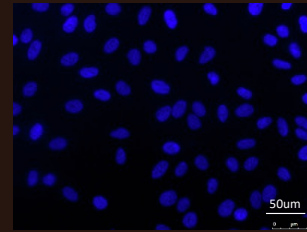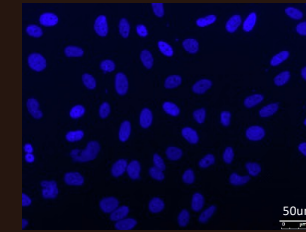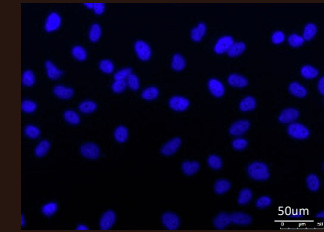N-  
Cadherin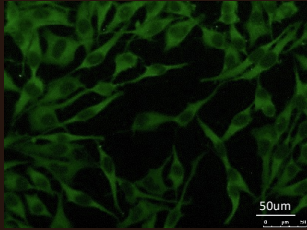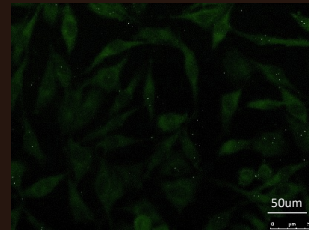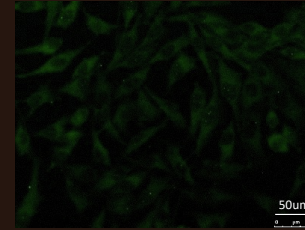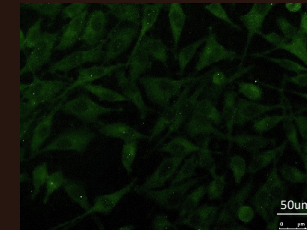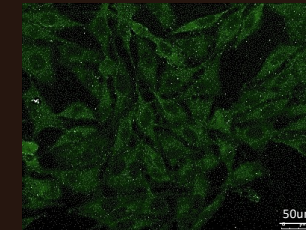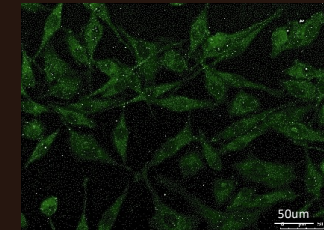

**Supplementary Figure 8.** Immunofluorescence analysis of PC3 cells treated with LLSO1, LLSO2 or LLSO3 at 10 uM for 48 hours shows a decrease in expression of N-cadherin (the examples shown here are the same as the ones shown in Supplementary Figure 5 above). When INCA-6 is used or INCA-6 and LLSO2, N-cadherin expression is rescued. Representative examples from at least 10 microscopic fields per experiment, and experiments repeated 3 times. Pictures taken at 200 X magnification.

20x

DU145+DMSO  
1° Ab:Ncadherin  
2° Ab: goat anti  
mouse 488

DU145+LLSO1  
1° Ab:Ncadherin  
2° Ab: goat anti  
mouse 488

DU145+LLSO2  
1° Ab:Ncadherin  
2° Ab: goat anti  
mouse 488

DU145+LLSO3  
1° Ab:Ncadherin  
2° Ab: goat anti  
mouse 488

DU145+INCA-6  
1° Ab:Ncadherin  
2° Ab: goat anti  
mouse 488

DU145+LLSO2+INCA-6  
1° Ab:Ncadherin  
2° Ab: goat anti mouse  
488

DAPI

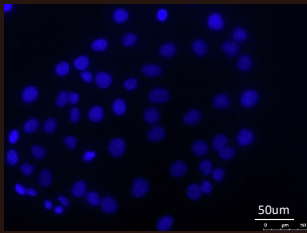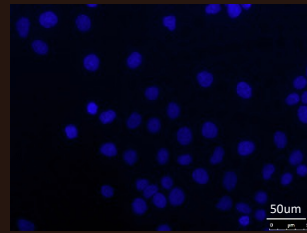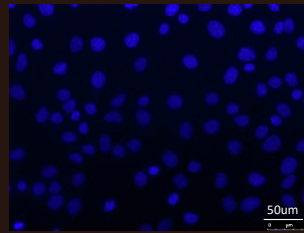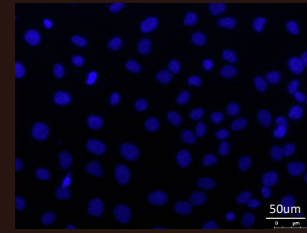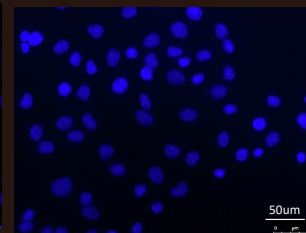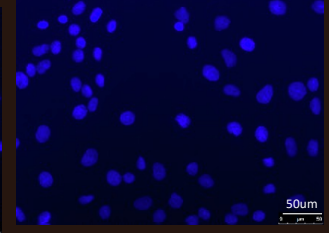

N-  
Cadherin

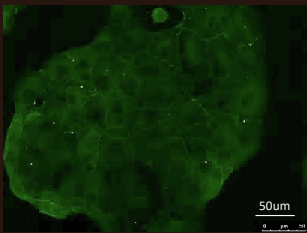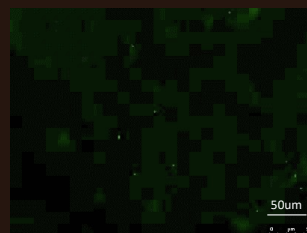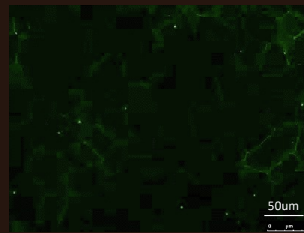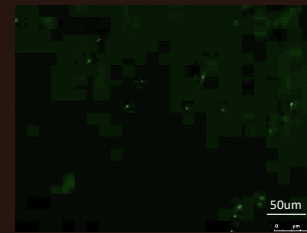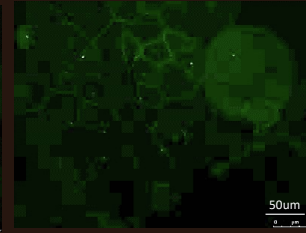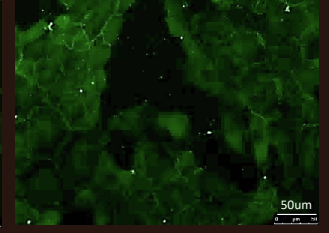

**Supplementary Figure 9.** Immunofluorescence analysis of DU145 cells treated with LLSO1, LLSO2 or LLSO3 at 10  $\mu$ M for 48 hours shows a decrease in expression of N-cadherin. When INCA-6 is used or INCA-6 and LLSO2, N-cadherin expression is rescued. Representative examples from at least 10 microscopic fields per experiment, and experiments repeated 3 times Pictures taken at 200 X magnification.

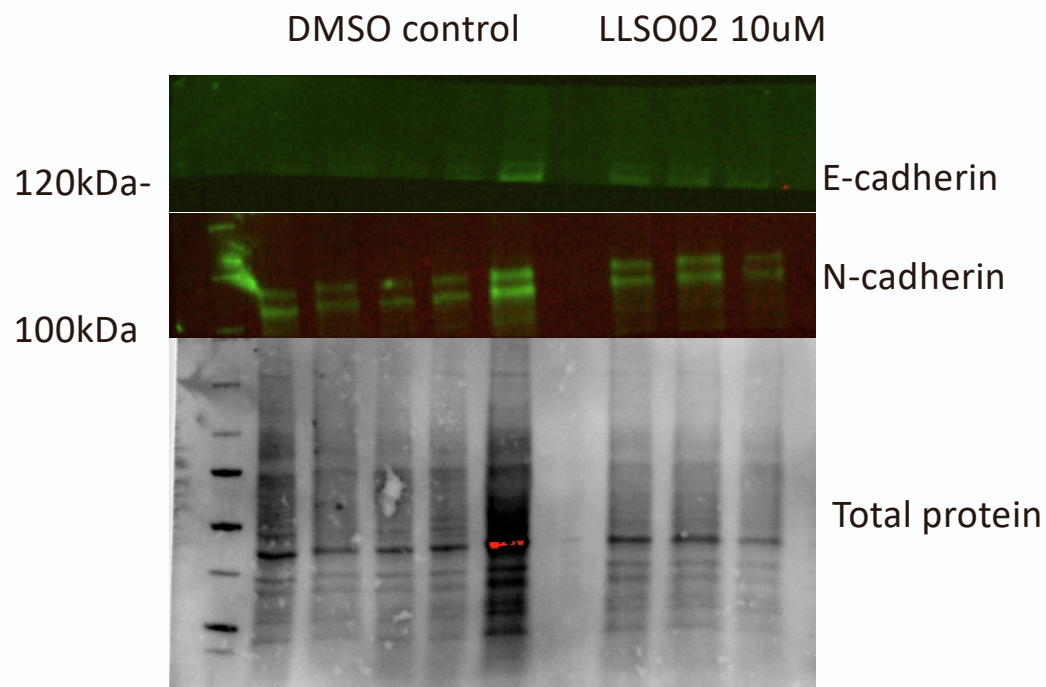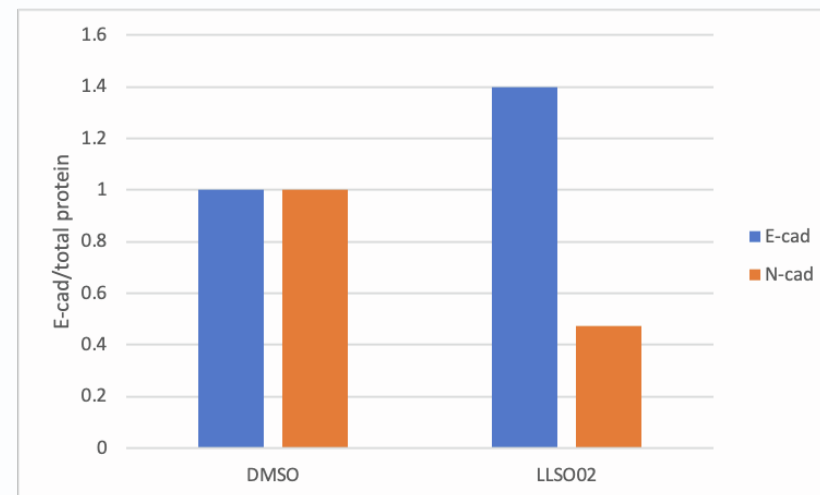

**Supplementary Figure 10. LLSO02 induces MET changes in tumour xenografts.** Western blot analysis of protein extracts from excised tumours show an increase in E-cadherin and a decrease in N-cadherin, consistent with inducing MET (n=3 replicates, 1 experiment).

# LC50 for PC3 treated with LLSO1

LC50 of PC3 treated with different concentration of LLSO1

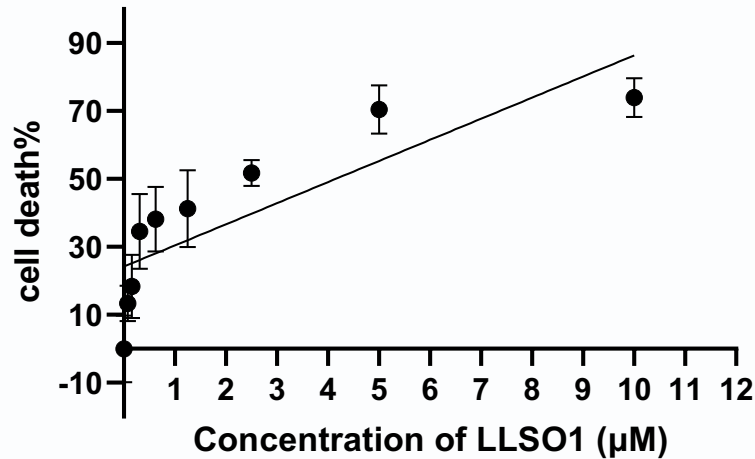

$$Y = 6.216 \cdot X + 24.22$$

$$Y = mx + c, \quad Y = 6.216 \cdot X + 24.22, \quad m = 6.216, \quad c = 24.22$$

According to  $LC50 = [(50-c)/m]$  formula,  $LC50$  for PC3 treated with LLSO1 is  $(50-24.22)/6.216 = 4.15 \mu\text{M}$

LC50 of PC3 treated with different concentration of LLSO1

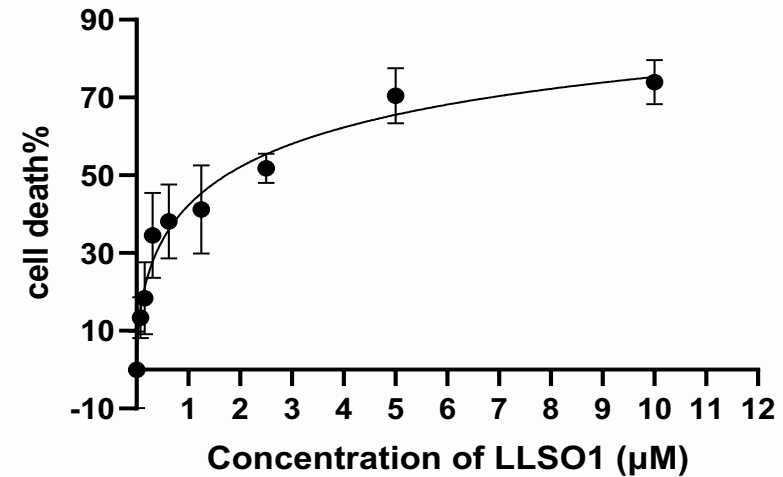

$$Y = 6.216 \cdot X + 24.22$$

**Supplementary Figure 11.** The  $LC50$  curve of PC3 treated with different concentration of LLSO1.

MTT assay was performed following 48 hours pre-treatment of DMSO and different concentration of LLSO1 in PC3 cells. Absorbance rate on MTT assay of PC3 treated with  $0.078125 \mu\text{M}$ ,  $0.15625 \mu\text{M}$ ,  $0.3125 \mu\text{M}$ ,  $0.625 \mu\text{M}$ ,  $1.25 \mu\text{M}$ ,  $2.5 \mu\text{M}$ ,  $5 \mu\text{M}$ ,  $10 \mu\text{M}$  LLSO1, and DMSO (as control) at  $OD = 590\text{nm}$ . Six replicated within each experiment. The  $LC50$  for PC3 treated with LLSO1 is  $4.15 \mu\text{M}$

# LC50 for PC3 treated with LLSO2

LC50 of PC3 treated with different concentration of LLSO2

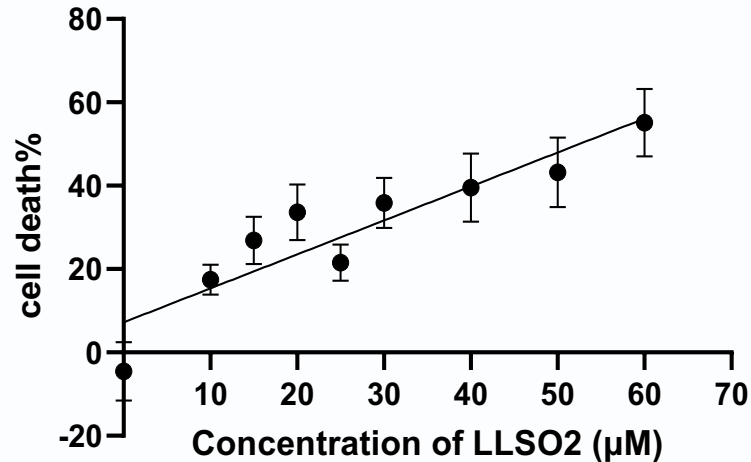

$$Y = 0.8152 * X + 7.220$$

$$Y = mx + c, \quad Y = 0.8152 * X + 7.22, \quad m = 0.8152, \quad c = 7.22$$

According to  $LC50 = [(50 - c) / m]$  formula, LC50 for PC3 treated with LLSO1 is  $(50 - 7.22) / 0.8152 = 52.48 \mu M$

LC50 of PC3 treated with different concentration of LLSO2

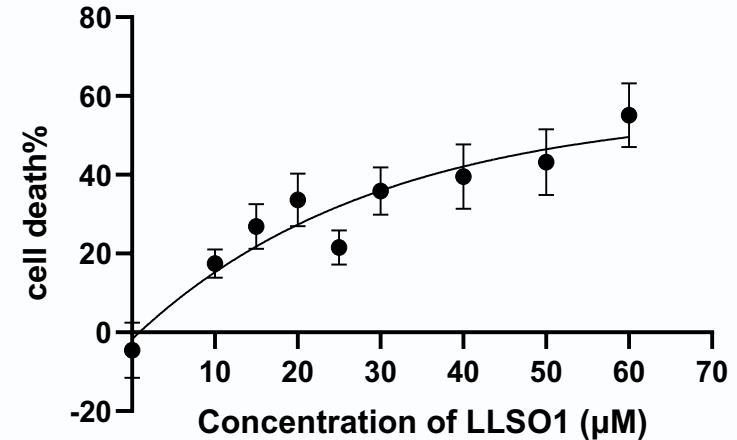

$$Y = 0.8152 * X + 7.22$$

**Supplementary Figure 12.** The LC50 curve of PC3 treated with different concentration of LLSO2.

MTT assay was performed following 48 hours pre-treatment of DMSO and different concentration of LLSO2 in PC3 cells. Absorbance rate on MTT assay of PC3 treated with 10µM, 15µM, 20µM, 25µM, 30µM, 40µM, 50µM, 60µM LLSO2, and DMSO (as control) at OD = 590nm. Six replicated within each experiment. The LC50 for PC3 treated with LLSO2 is 52.48µM

# LC50 for PC3 treated with LLSO3

LC50 of PC3 treated with different concentration of LLSO3

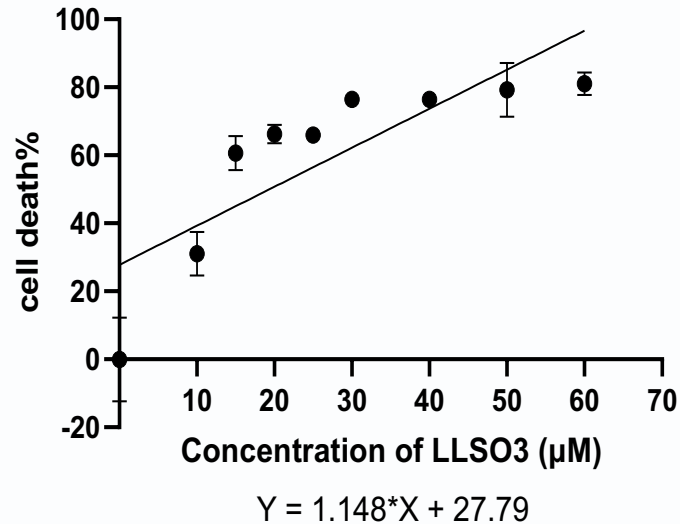

LC50 of PC3 treated with different concentration of LLSO3

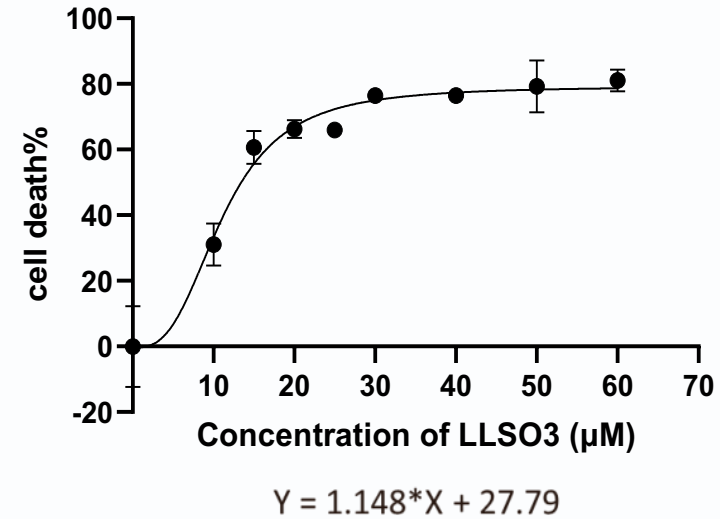

$$Y = mx + c, \quad Y = 1.148 * X + 27.79, \quad m = 1.148, \quad c = 27.79$$

According to  $LC50 = [(50 - c) / m]$  formula,  $LC50$  for PC3 treated with LLSO1 is  $(50 - 27.79) / 1.148 = 19.35 \mu\text{M}$

**Supplementary Figure 13.** The  $LC50$  curve of PC3 treated with different concentration of LLSO3.

MTT assay was performed following 48 hours pre-treatment of DMSO and different concentration of LLSO3 in PC3 cells. Absorbance rate on MTT assay of PC3 treated with  $10 \mu\text{M}$ ,  $15 \mu\text{M}$ ,  $20 \mu\text{M}$ ,  $25 \mu\text{M}$ ,  $30 \mu\text{M}$ ,  $40 \mu\text{M}$ ,  $50 \mu\text{M}$ ,  $60 \mu\text{M}$  LLSO3, and DMSO (as control) at  $OD = 590 \text{nm}$ . Six replicated within each experiment. The  $LC50$  for PC3 treated with LLSO3 is  $19.35 \mu\text{M}$
